# Supplementary material for: Treatment of Hypertensive Patients with a Fixed-Dose Combination of Bisoprolol and Amlodipine: Results of a Cohort study with More Than 10,000 Patients
Source: PubMed Central journal article supplement — Cardiol Ther. 2015 Aug 8;4(2):179–90. doi: 10.1007/s40119-015-0045-z (PMC4675749; doi:10.1007/s40119-015-0045-z), 2015-08-08
Supplement: 40119_2015_45_MOESM1_ESM.pdf [file 40119_2015_45_MOESM1_ESM.pdf]

- *Why carry out this study?*
  - This non-interventional study investigated the effects on adherence and blood pressure (BP) control of switching from a free-dose combination of the two antihypertensive substances to a fixed-dose combination (FDC) in a larger patient population.
  - The hypothesis was that at least 99% of the patients would show good to excellent adherence under the FDC.
- *What was learned from the study?*
  - Pill counts at 6 months revealed a good to excellent adherence in > 95% of the patients, and clinically-relevant improvement in systolic BP was established for 82% of patients.
  - These data from a non-interventional study in a large patient population demonstrate the benefits of prescribing a FDC in terms of an excellent adherence.
  - Excellent adherence may lead to an associated improvement in control of previously elevated BP, which may be relevant in real-life practice.

This summary slide represents the opinions of the authors. Sponsorship for this study was funded by Merck KGaA . For a full list of acknowledgments and conflicts of interest for all authors of this article, please see the full text online. Copyright © The Author(s) 2015. Creative Commons Attribution Noncommercial License (CC BY-NC).
